# Supplementary material for: Revealing the Pathogenesis of Salt-Sensitive Hypertension in Dahl Salt-Sensitive Rats through Integrated Multi-Omics Analysis
Source: MDPI journal article supplement (doi:10.3390/metabo12111076), 2022-11-07
Supplement: s1 [file s1]

**Table S1.** Microbial functions analysis by Phylogenetic Investigation of Communities by Reconstruction of Unobserved states (PICRUSt)

| Function pathway                                                | NS     | HS     | HSCUR  | Raw p value | BH adjusted p-value |
|-----------------------------------------------------------------|--------|--------|--------|-------------|---------------------|
| L3_Apoptosis                                                    | 0.0216 | 0.058  | 0.0139 | 0.0151      | 0.0773              |
| L3_Bacterial.chemotaxis                                         | 0.0583 | 0.0521 | 0.0429 | 0.0097      | 0.0773              |
| L3_Bacterial.motility.proteins                                  | 0.0575 | 0.0523 | 0.0436 | 0.0257      | 0.0799              |
| L3_Cell.cycle...Caulobacter                                     | 0.0509 | 0.056  | 0.0433 | 0.033       | 0.0814              |
| L3_Flagellar.assembly                                           | 0.0618 | 0.0524 | 0.0414 | 0.0086      | 0.0773              |
| L3_Peroxisome                                                   | 0.0413 | 0.0591 | 0.0466 | 0.0234      | 0.0773              |
| L3_Cell.division_Unclassified                                   | 0.0604 | 0.0536 | 0.0401 | 0.0171      | 0.0773              |
| L3_Cell.motility.and.secretion_Unclassified                     | 0.0514 | 0.0596 | 0.042  | 0.041       | 0.0879              |
| L3_Inorganic.ion.transport.and.metabolism_Unclassified          | 0.0605 | 0.0531 | 0.0409 | 0.0172      | 0.0773              |
| L3_Membrane.and.intracellular.structural.molecules_Unclassified | 0.0605 | 0.0535 | 0.0406 | 0.0308      | 0.0814              |
| L3_Other.transporters_Unclassified                              | 0.0444 | 0.0563 | 0.0465 | 0.0213      | 0.0773              |
| L3_ABC.transporters                                             | 0.0616 | 0.0505 | 0.0411 | 0.0173      | 0.0773              |
| L3_Bacterial.toxins                                             | 0.1307 | 0.0163 | 0.0274 | 0.034       | 0.0814              |
| L3_Cellular.antigens                                            | 0.0354 | 0.0558 | 0.0514 | 0.0301      | 0.0814              |
| L3_G.protein.coupled.receptors                                  | 0.1979 | 0      | 0      | 0.0121      | 0.0773              |
| L3_Ion.channels                                                 | 0.0727 | 0.0519 | 0.0361 | 0.0044      | 0.0773              |
| L3_MAPK.signaling.pathway...yeast                               | 0.0242 | 0.0665 | 0.0516 | 0.0168      | 0.0773              |
| L3_Phosphatidylinositol.signaling.system                        | 0.0463 | 0.0582 | 0.0446 | 0.0291      | 0.0814              |
| L3_Transporters                                                 | 0.063  | 0.0489 | 0.0413 | 0.0218      | 0.0773              |
| L3_Aminoacyl.tRNA.biosynthesis                                  | 0.0538 | 0.0546 | 0.0429 | 0.0358      | 0.0828              |
| L3_Basal.transcription.factors                                  | 0.026  | 0.1435 | 0.0139 | 0.0232      | 0.0773              |
| L3_Base.excision.repair                                         | 0.0566 | 0.0541 | 0.0409 | 0.0182      | 0.0773              |
| L3_Chaperones.and.folding.catalysts                             | 0.056  | 0.0545 | 0.0419 | 0.0211      | 0.0773              |
| L3_Chromosome                                                   | 0.0536 | 0.055  | 0.0428 | 0.0184      | 0.0773              |
| L3_DNA.repair.and.recombination.proteins                        | 0.0529 | 0.0555 | 0.0424 | 0.0196      | 0.0773              |
| L3_DNA.replication                                              | 0.0503 | 0.0564 | 0.0431 | 0.0298      | 0.0814              |
| L3_DNA.replication.proteins                                     | 0.0521 | 0.0557 | 0.0427 | 0.0234      | 0.0773              |
| L3_Homologous.recombination                                     | 0.051  | 0.0561 | 0.043  | 0.0242      | 0.0785              |
| L3_Mismatch.repair                                              | 0.0528 | 0.0553 | 0.0423 | 0.0229      | 0.0773              |
| L3_Nucleotide.excision.repair                                   | 0.0529 | 0.0561 | 0.0418 | 0.0418      | 0.0888              |
| L3_Proteasome                                                   | 0.052  | 0.0554 | 0.043  | 0.0247      | 0.079               |
| L3_Protein.export                                               | 0.0538 | 0.0552 | 0.0423 | 0.0191      | 0.0773              |
| L3_RNA.degradation                                              | 0.0519 | 0.057  | 0.0426 | 0.0194      | 0.0773              |
| L3_RNA.polymerase                                               | 0.0529 | 0.0554 | 0.0426 | 0.0351      | 0.0821              |
| L3_RNA.transport                                                | 0.0536 | 0.0554 | 0.0426 | 0.0315      | 0.0814              |
| L3_Replication..recombination.and.repair.proteins_Unclassified  | 0.0688 | 0.0503 | 0.0367 | 0.041       | 0.0879              |
| L3_Ribosome                                                     | 0.054  | 0.0551 | 0.0422 | 0.0194      | 0.0773              |
| L3_Ribosome.Biogenesis                                          | 0.0543 | 0.0552 | 0.0423 | 0.0158      | 0.0773              |
| L3_Ribosome.biogenesis.in.eukaryotes                            | 0.0535 | 0.059  | 0.0397 | 0.0096      | 0.0773              |
| L3_Sulfur.relay.system                                          | 0.0518 | 0.0575 | 0.0423 | 0.0395      | 0.0879              |
| L3_Transcription.factors                                        | 0.0665 | 0.0481 | 0.0402 | 0.0227      | 0.0773              |
| L3_Transcription.machinery                                      | 0.0536 | 0.0561 | 0.0422 | 0.0328      | 0.0814              |
| L3_Transcription.related.proteins_Unclassified                  | 0.1131 | 0.0347 | 0.0241 | 0.0058      | 0.0773              |

|                                                      |        |        |        |        |        |
|------------------------------------------------------|--------|--------|--------|--------|--------|
| L3_Translation.factors                               | 0.0527 | 0.0554 | 0.0428 | 0.0274 | 0.0814 |
| L3_Translation.proteins_Unclassified                 | 0.0552 | 0.0552 | 0.042  | 0.0156 | 0.0773 |
| L3_Ubiquitin.system                                  | 0.0505 | 0.0604 | 0.0415 | 0.0404 | 0.0879 |
| L3_Amino.acid.metabolism_Unclassified                | 0.091  | 0.0418 | 0.0306 | 0.0066 | 0.0773 |
| L3_Amino.acid.related.enzymes                        | 0.0565 | 0.0528 | 0.0425 | 0.0215 | 0.0773 |
| L3_Aminobenzoate.degradation                         | 0.0577 | 0.0559 | 0.0401 | 0.0118 | 0.0773 |
| L3_Arginine.and.proline.metabolism                   | 0.0596 | 0.0511 | 0.0421 | 0.0231 | 0.0773 |
| L3_Ascorbate.and.aldarate.metabolism                 | 0.0935 | 0.0389 | 0.0311 | 0.0328 | 0.0814 |
| L3_Benzoate.degradation                              | 0.0661 | 0.0469 | 0.0398 | 0.0436 | 0.0889 |
| L3_Biosynthesis.of.vancomycin.group.antibiotics      | 0.0716 | 0.0491 | 0.0378 | 0.004  | 0.0773 |
| L3_Biotin.metabolism                                 | 0.0517 | 0.0589 | 0.0414 | 0.0126 | 0.0773 |
| L3_Carbon.fixation.pathways.in.prokaryotes           | 0.0526 | 0.0559 | 0.0428 | 0.037  | 0.0836 |
| L3_Cysteine.and.methionine.metabolism                | 0.0546 | 0.0541 | 0.0424 | 0.0291 | 0.0814 |
| L3_D.Glutamine.and.D.glutamate.metabolism            | 0.0586 | 0.0538 | 0.0409 | 0.003  | 0.0773 |
| L3_Dioxin.degradation                                | 0.088  | 0.0397 | 0.0343 | 0.0086 | 0.0773 |
| L3_Drug.metabolism...other.enzymes                   | 0.0569 | 0.0529 | 0.042  | 0.0048 | 0.0773 |
| L3_Fatty.acid.biosynthesis                           | 0.045  | 0.0564 | 0.0462 | 0.031  | 0.0814 |
| L3_Fatty.acid.elongation.in.mitochondria             | 0.0001 | 0.1898 | 0.0098 | 0.0255 | 0.0799 |
| L3_Flavone.and.flavonol.biosynthesis                 | 0.1703 | 0.0054 | 0.0176 | 0.0322 | 0.0814 |
| L3_Folate.biosynthesis                               | 0.0552 | 0.0562 | 0.0414 | 0.0198 | 0.0773 |
| L3_Glycan.biosynthesis.and.metabolism_Unclassified   | 0.0607 | 0.0546 | 0.0399 | 0.0211 | 0.0773 |
| L3_Glycerolipid.metabolism                           | 0.0644 | 0.0481 | 0.0412 | 0.0149 | 0.0773 |
| L3_Glycerophospholipid.metabolism                    | 0.0583 | 0.0536 | 0.0411 | 0.0139 | 0.0773 |
| L3_Glycine..serine.and.threonine.metabolism          | 0.0545 | 0.054  | 0.043  | 0.0496 | 0.0973 |
| L3_Glycosphingolipid.biosynthesis...ganglio.series   | 0.0071 | 0.067  | 0.0578 | 0.0464 | 0.0936 |
| L3_Glycosyltransferases                              | 0.0568 | 0.0545 | 0.0418 | 0.0397 | 0.0879 |
| L3_Histidine.metabolism                              | 0.0422 | 0.0569 | 0.0463 | 0.0217 | 0.0773 |
| L3_Isoquinoline.alkaloid.biosynthesis                | 0.0642 | 0.0533 | 0.0387 | 0.0045 | 0.0773 |
| L3_Lipoic.acid.metabolism                            | 0.0515 | 0.0587 | 0.0421 | 0.033  | 0.0814 |
| L3_Lipopolysaccharide.biosynthesis                   | 0.0539 | 0.0587 | 0.0412 | 0.0296 | 0.0814 |
| L3_Lipopolysaccharide.biosynthesis.proteins          | 0.0554 | 0.0568 | 0.0416 | 0.0436 | 0.0889 |
| L3_Metabolism.of.cofactors.and.vitamins_Unclassified | 0.0578 | 0.0564 | 0.0403 | 0.0114 | 0.0773 |
| L3_Nitrotoluene.degradation                          | 0.0756 | 0.0499 | 0.0334 | 0.002  | 0.0773 |
| L3_Nucleotide.metabolism_Unclassified                | 0.0948 | 0.0409 | 0.0299 | 0.003  | 0.0773 |
| L3_One.carbon.pool.by.folate                         | 0.0554 | 0.0541 | 0.0421 | 0.0145 | 0.0773 |
| L3_Pantothenate.and.CoA.biosynthesis                 | 0.0544 | 0.0542 | 0.0428 | 0.0478 | 0.0956 |
| L3_Penicillin.and.cephalosporin.biosynthesis         | 0.0529 | 0.0688 | 0.0349 | 0.0085 | 0.0773 |
| L3_Peptidases                                        | 0.0568 | 0.0522 | 0.0427 | 0.0284 | 0.0814 |
| L3_Photosynthesis                                    | 0.0526 | 0.0555 | 0.0427 | 0.0119 | 0.0773 |
| L3_Photosynthesis.proteins                           | 0.0528 | 0.0555 | 0.0427 | 0.0173 | 0.0773 |
| L3_Porphyrin.and.chlorophyll.metabolism              | 0.0586 | 0.052  | 0.0416 | 0.0054 | 0.0773 |
| L3_Protein.kinases                                   | 0.0605 | 0.0521 | 0.0409 | 0.0091 | 0.0773 |
| L3_Purine.metabolism                                 | 0.0549 | 0.0542 | 0.0426 | 0.0231 | 0.0773 |
| L3_Pyrimidine.metabolism                             | 0.0525 | 0.0546 | 0.0432 | 0.0351 | 0.0821 |
| L3_Pyruvate.metabolism                               | 0.0557 | 0.0544 | 0.042  | 0.0183 | 0.0773 |
| L3_Riboflavin.metabolism                             | 0.0564 | 0.0554 | 0.0411 | 0.0362 | 0.0828 |
| L3_Selenocompound.metabolism                         | 0.0606 | 0.0521 | 0.0415 | 0.0043 | 0.0773 |
| L3_Steroid.biosynthesis                              | 0.0001 | 0.1895 | 0.01   | 0.0337 | 0.0814 |

|                                                          |        |        |        |        |        |
|----------------------------------------------------------|--------|--------|--------|--------|--------|
| L3_Stilbenoid..diarylheptanoid.and.gingerol.biosynthesis | 0.0175 | 0.0578 | 0.0053 | 0.0097 | 0.0773 |
| L3_Sulfur.metabolism                                     | 0.055  | 0.0562 | 0.0421 | 0.0134 | 0.0773 |
| L3_Synthesis.and.degradation.of.ketone.bodies            | 0.0563 | 0.0594 | 0.0375 | 0.0062 | 0.0773 |
| L3_Taurine.and.hypotaurine.metabolism                    | 0.0585 | 0.0549 | 0.0408 | 0.0057 | 0.0773 |
| L3_Terpenoid.backbone.biosynthesis                       | 0.0506 | 0.057  | 0.0427 | 0.0284 | 0.0814 |
| L3_Thiamine.metabolism                                   | 0.0543 | 0.0553 | 0.0422 | 0.0184 | 0.0773 |
| L3_Various.types.of.N.glycan.biosynthesis                | 0.0336 | 0.116  | 0.0049 | 0.0432 | 0.0889 |
| L3_Vitamin.B6.metabolism                                 | 0.0521 | 0.0555 | 0.043  | 0.0486 | 0.0962 |
| L3_Xylene.degradation                                    | 0.0901 | 0.0406 | 0.0321 | 0.0031 | 0.0773 |
| L3_Zeatin.biosynthesis                                   | 0.053  | 0.0551 | 0.0427 | 0.0207 | 0.0773 |
| L3_beta.Lactam.resistance                                | 0.0544 | 0.0654 | 0.0343 | 0.0117 | 0.0773 |
| L3_Function.unknown_Unclassified                         | 0.0586 | 0.0533 | 0.0414 | 0.0333 | 0.0814 |
| L3_General.function.prediction.only_Unclassified         | 0.0567 | 0.0528 | 0.0423 | 0.0431 | 0.0889 |

---
